# Supplementary material for: Synthesis of pyramidal tetraarylborate pentads
Source: Royal Society of Chemistry journal article supplement (doi:10.1039/c9nj01772k), 2019-01-01
Supplement: c9nj01772k1.pdf [file c9nj01772k1.pdf]

*Electronic Supplementary Information for*

# Synthesis of pyramidal tetraarylborate pentads

Nobuhito Sakamoto,<sup>a</sup> Masahiko Ohta,<sup>a</sup> Kenta Kokado,<sup>a\*</sup> Kazuki Sada<sup>a\*</sup>

<sup>a</sup>*Graduate School of Chemical Sciences and Engineering, and Department of Chemistry, Faculty of Science,*

*Hokkaido University*

Kita10 Nishi8, Kita-ku, Sapporo, 060-0810, Japan

E-mail: kokado@sci.hokudai.ac.jp, sadatcm@sci.hokudai.ac.jp

(a)

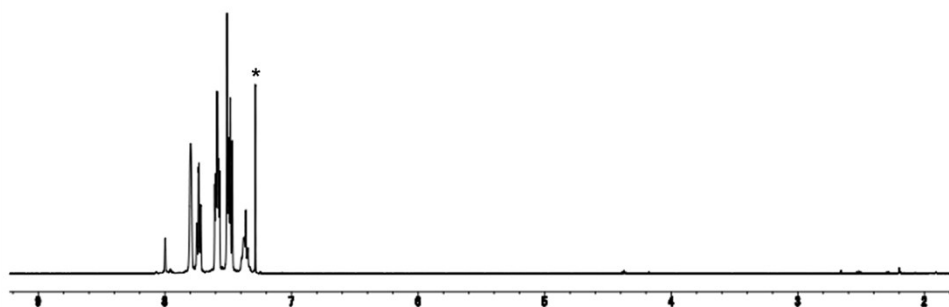

(b)

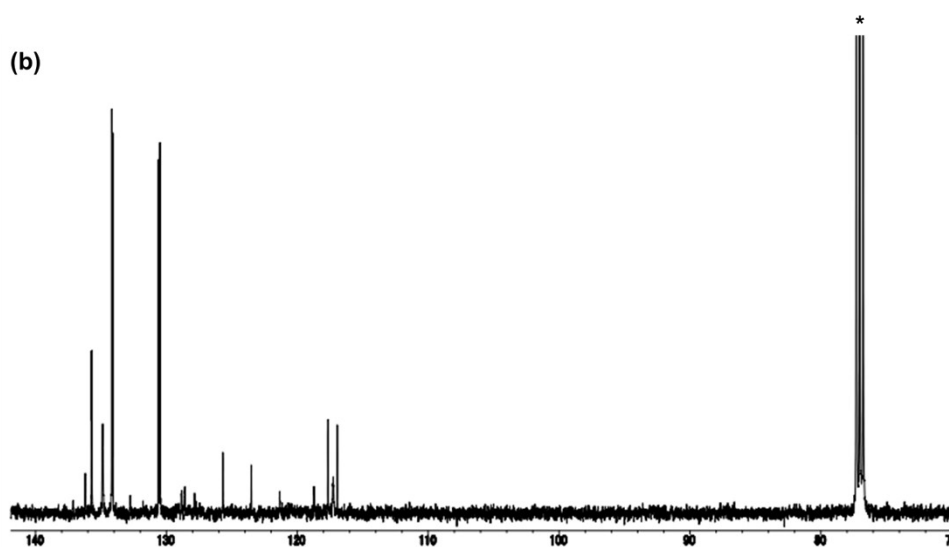

**Figure S1.** (a)  $^1\text{H}$  NMR and (b)  $^{13}\text{C}$  NMR spectrum of  $(\text{TPP})_5 \cdot \mathbf{1}$  in  $\text{CDCl}_3$  at room temperature. The solvents peaks are marked as asterisk.

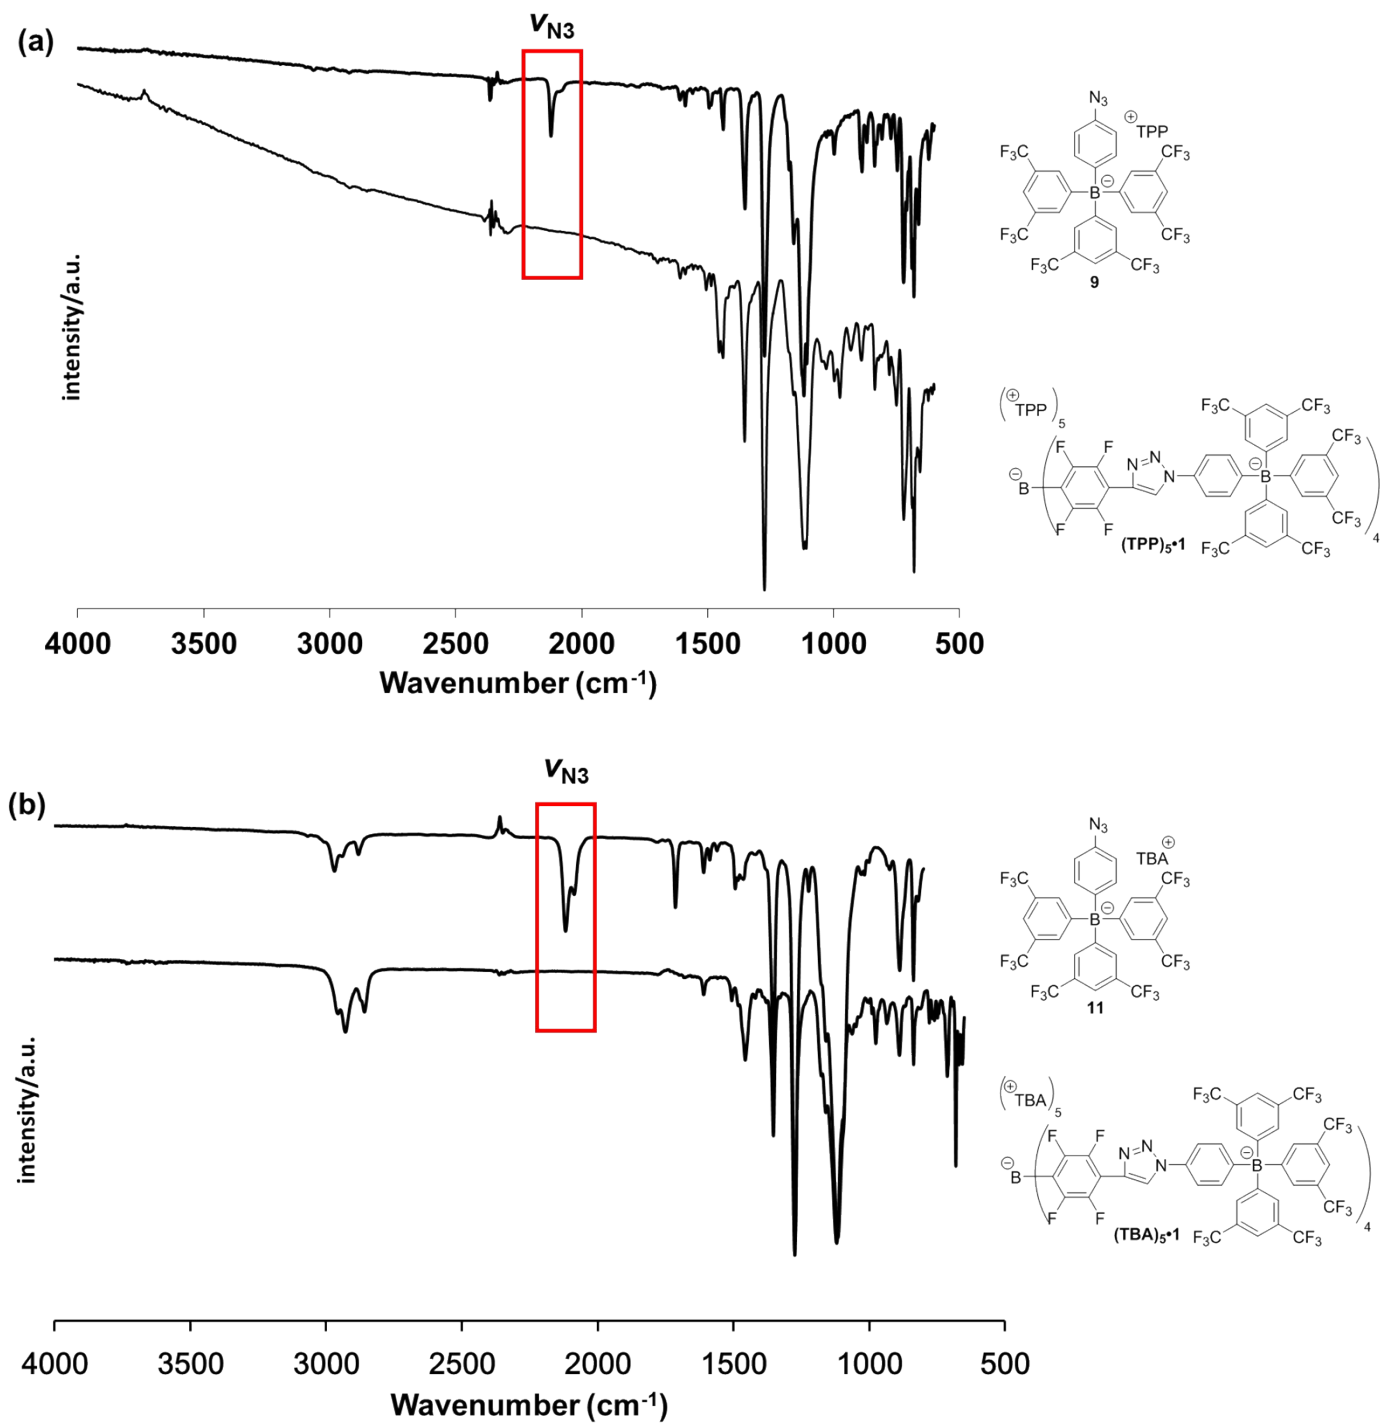

**Figure S2.** FT-IR spectra of (a) **9** and **(TPP)<sub>5</sub>·1**, and (b) **11** and **(TBA)<sub>5</sub>·1**.

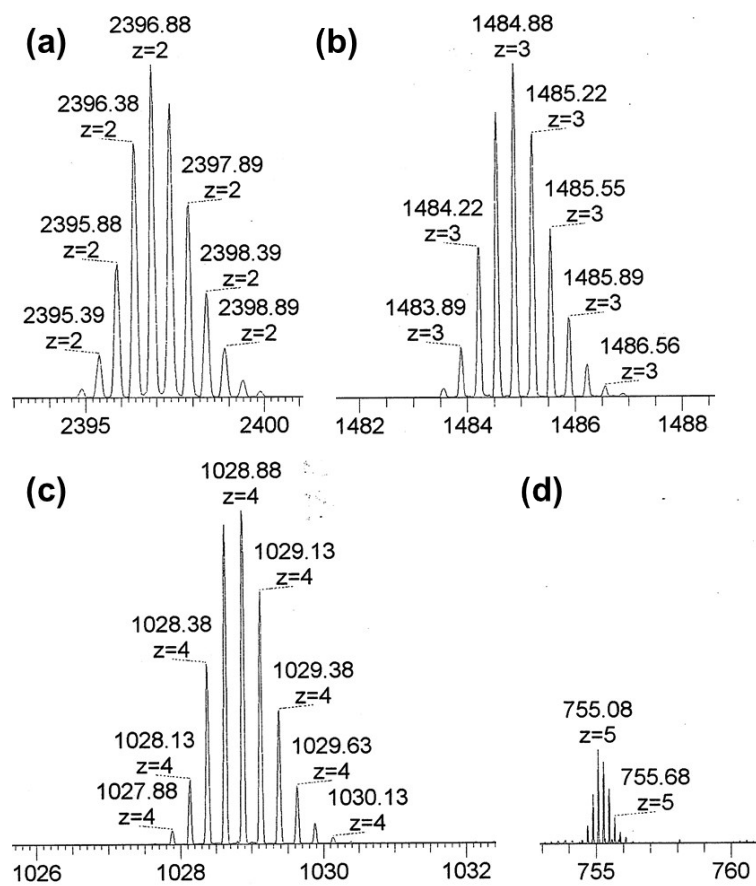

**Figure S3.** Electron-spray ionization mass spectrum (ESI-MS) of  $(\text{TPP})_5 \cdot 1$  for (a)  $z = 2$ , (b)  $z = 3$ , (c)  $z = 4$ , (d)  $z = 5$ .

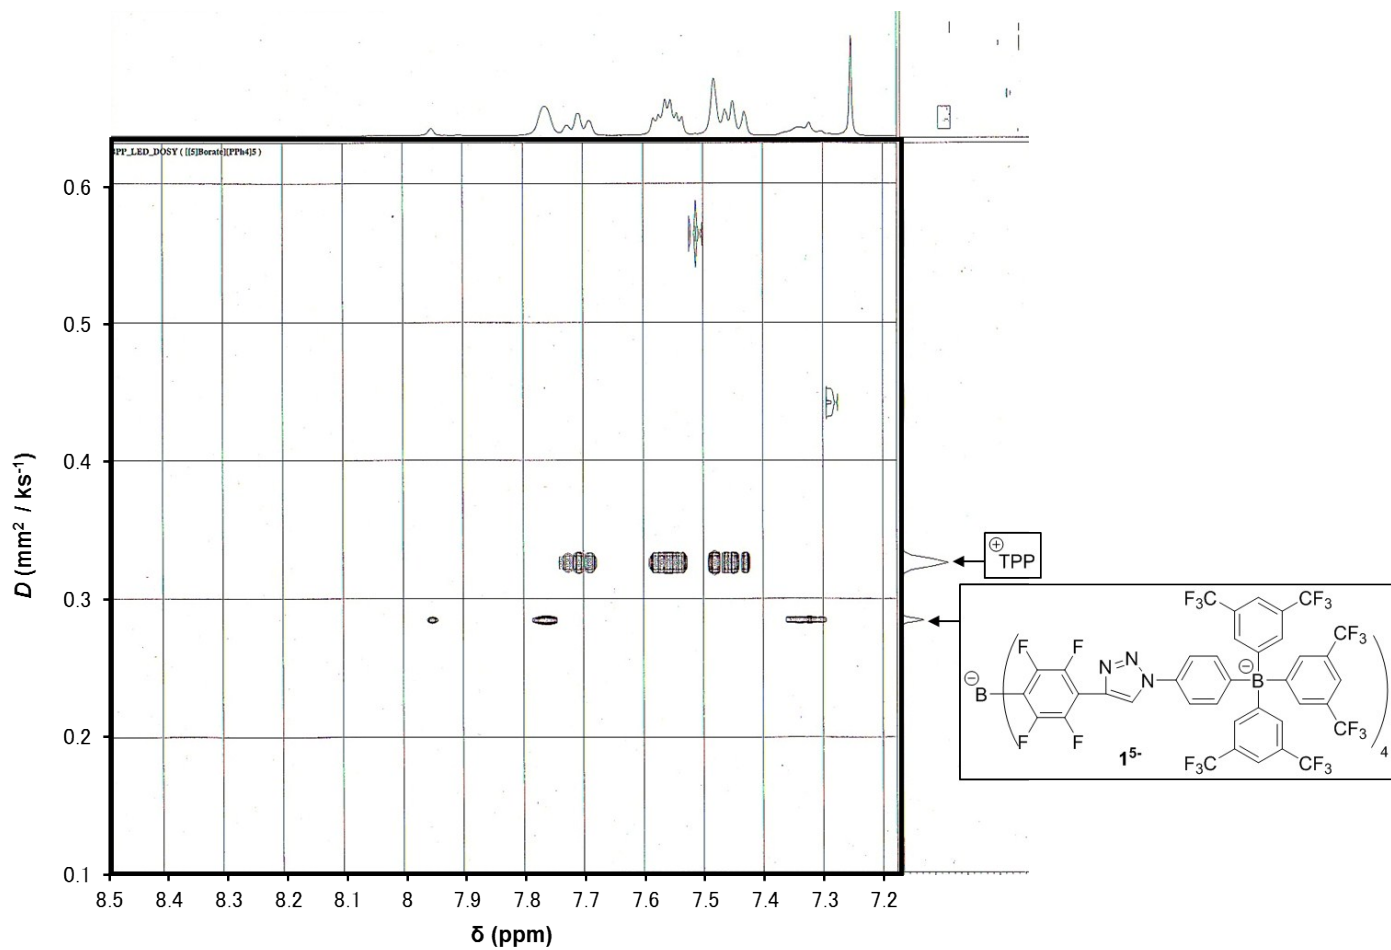

**Figure S4.** DOSY spectrum of (TPP)<sub>5</sub>·**1** in CDCl<sub>3</sub> (2 mM) at 20 °C.
